# Supplementary material for: Excellent performance supercapacitors with the compounding of Ni(OH)2 and ZIF-67 derived Co–C–N nanosheets as flexible electrode materials
Source: Royal Society of Chemistry journal article supplement (doi:10.1039/d2na00501h), 2022-01-01
Supplement: d2na00501h1.pdf [file d2na00501h1.pdf]

Electronic Supplementary Material (ESI) for Nanoscale Advances. This journal is © The Royal Society of Chemistry 2022

## Supplementary Information

### Excellent performance supercapacitors with compound of Ni(OH)<sub>2</sub> and ZIF-67 derived Co-C-N nanosheets as flexible electrode material

Dequan Li<sup>a</sup>, Congcong Shen<sup>a</sup>, Qiang Lu<sup>a</sup>, Ruihan Yan<sup>a</sup>, Bin Xiao<sup>a</sup>, Baoye Zi<sup>a</sup>, Jin Zhang<sup>a</sup>, Qingjie Lu<sup>\*a</sup>, Qingju Liu<sup>\*a</sup>

---

<sup>a</sup> Yunnan Key Laboratory for Micro/Nano Materials & Technology, National Center for International Research on Photoelectric and Energy Materials, School of Materials and Energy, Yunnan University, Kunming 650091, P. R. China.

\* Corresponding author: Qingju Liu, **E-mail:** [qjliu@ynu.edu.cn](mailto:qjliu@ynu.edu.cn). Qingjie Lu, **E-mail:** [2789584342@qq.com](mailto:2789584342@qq.com).

Tel: +86 871 65032713

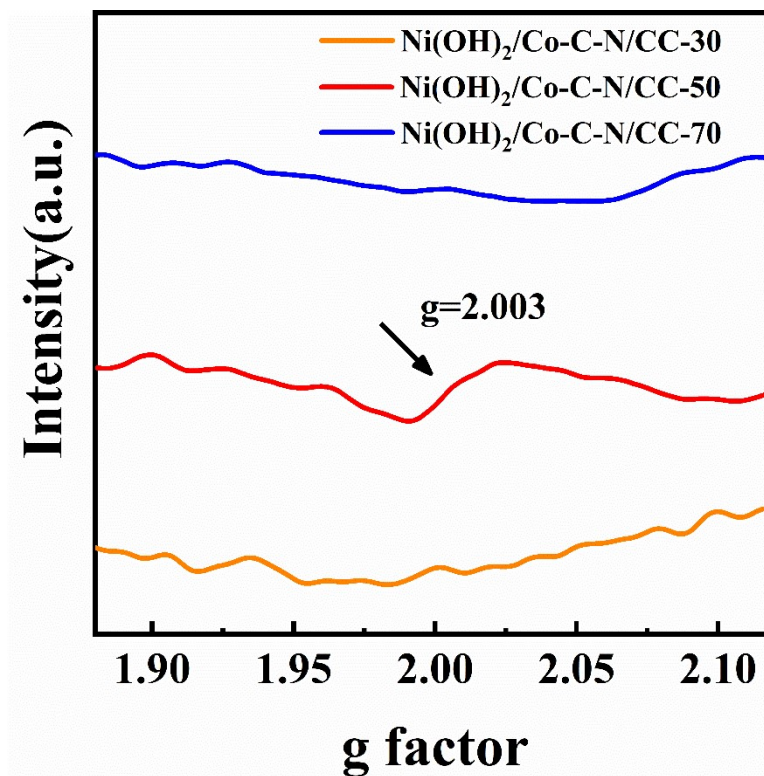

Fig. S1. Electron paramagnetic resonance (EPR) spectra of Ni(OH)<sub>2</sub>/Co-C-N/CC-30, Ni(OH)<sub>2</sub>/Co-C-N/CC-50, and Ni(OH)<sub>2</sub>/Co-C-N/CC-70

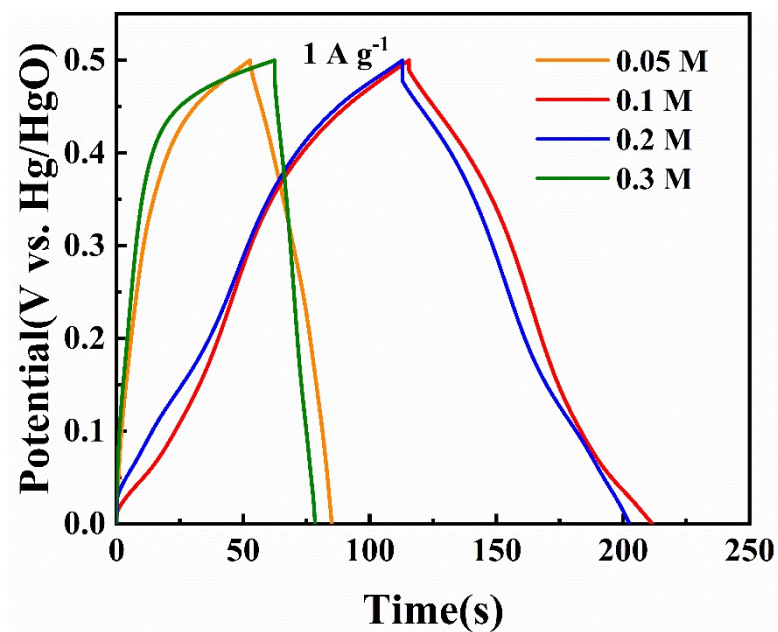

Fig. S2. Galvanostatic charge/discharge curves of Co-C-N/CC prepared with different concentrations of dimethylimidazole at 1A g<sup>-1</sup> current density

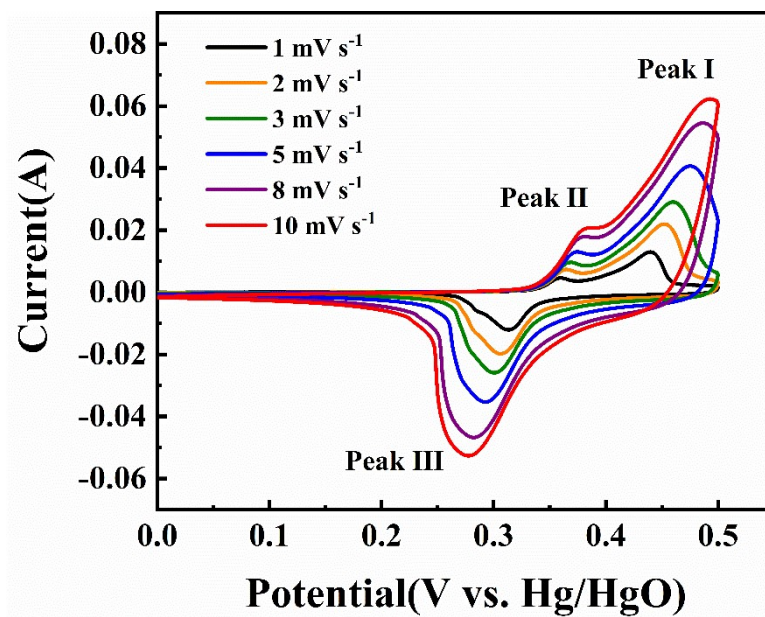

Fig. S3. CV curves of Ni(OH)<sub>2</sub>/Co-C-N/CC-50 at various small scan rates from 1 to 10 mV s<sup>-1</sup> and different peak currents.
